# Supplementary material for: The New White Flight?: The Effects of Political Appeals to Latinos on White Democrats
Source: Springer Nature journal article supplement (doi:10.1007/s11109-018-9462-8), 2018-04-28
Supplement: MOESM1 [file 15727646]

**ONLINE APPENDIX 1: SCRIPT OF OBAMA AD**

**GENERAL AUDIENCE AD:**

**Obama**: I’m Barack Obama and I approve this message.

**Narrator:** Born on an island, his family didn’t have much. But Barack Obama understands the worries of parents. That explains why the Obama plan is the best plan.

**Obama:** The time has come to reform our education system, where students get the resources that they need to finally achieve their dreams. I’ll be a president who finally makes health care affordable and I’ll be a president who ends this war in Iraq and finally brings our troops home.

**LATINO TARGETED AD:**

**Obama**: I’m Barack Obama and I approve this message.

**Narrator:** Nacido en una isla de una familia de pocos recursos, Barack Obama entiende las preocupaciones que llevan los padres. Eso explica porque el plan de Obama es el mejor plan.

**Obama:** The time has come to reform our education system, where students get the resources that they need to finally achieve their dreams. I’ll be a president who finally makes health care affordable and I’ll be a president who ends this war in Iraq and finally brings our troops home.

**ONLINE APPENDIX 2:**

**
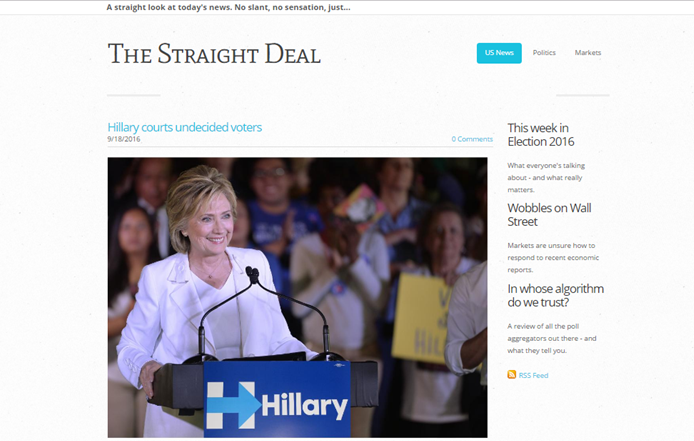
**

**
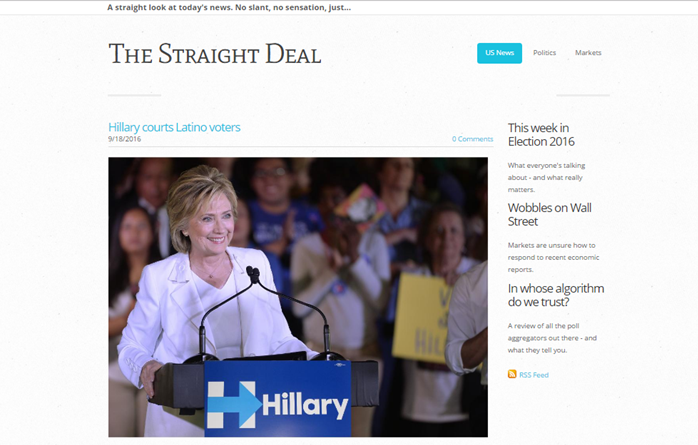
**

**
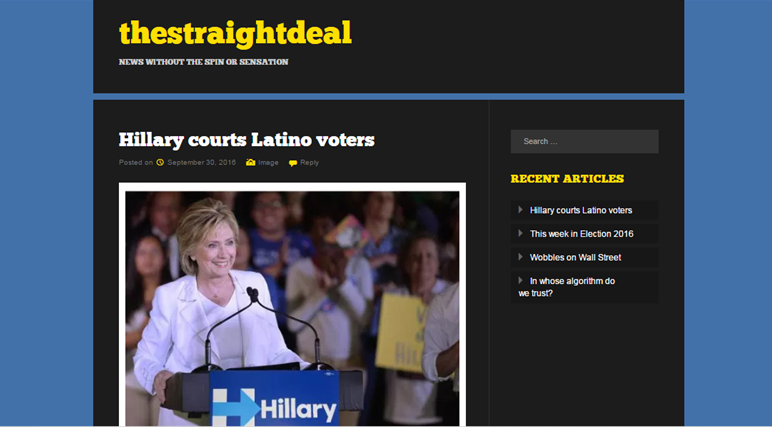
**

**
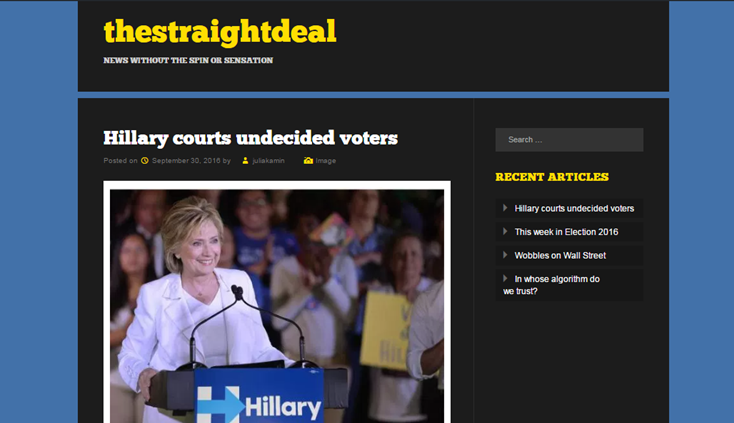
**

**ONLINE APPENDIX 3: SAMPLE DEMOGRAPHICS**

|  | **ANES 2016** | **Experiment 1 (KN)** | **Experiment 2 (MTurk)** | **Experiment 3 (Qualtrics)** |
| --- | --- | --- | --- | --- |
| **Age (mean)** | 50.5 years | 50.0 | 36.5 | 49.3 |
| **Female** | 56.5% | 48.6% | 57.6% | 70% |
| **Less than high school** | 4.4% | 6.8% | 1.5% | 3.8% |
| **High School** | 16.0% | 26.4% | 28.6% | 33.1% |
| **Some College** | 29.3% | 28.6% | 14.3% | 17.7% |
| **Bachelors** | 25% | 38.2% | 41.0% | 27.7% |
| **Advanced Degree** | 24.5% | 14.6% | 17.7% |
